# Supplementary material for: Halogen bonded supramolecular assemblies constructed from azulene derivatives and perfluorinated di-/triiodobenzenes
Source: Royal Society of Chemistry journal article supplement (doi:10.1039/d3ce00752a), 2023-01-01
Supplement: d3ce00752a1.pdf [file d3ce00752a1.pdf]

## Electronic Supplementary Information

### Halogen bonded supramolecular assemblies constructed from azulene-containing molecules and perfluorinated di-/triiodobenzenes

Andreea Dogaru, Adrian Apostol, Catalin Maxim, Mihai Raduca, Alexander S. Novikov, Alina Nicolescu, Calin Deleanu, Simona Nica and Marius Andruh

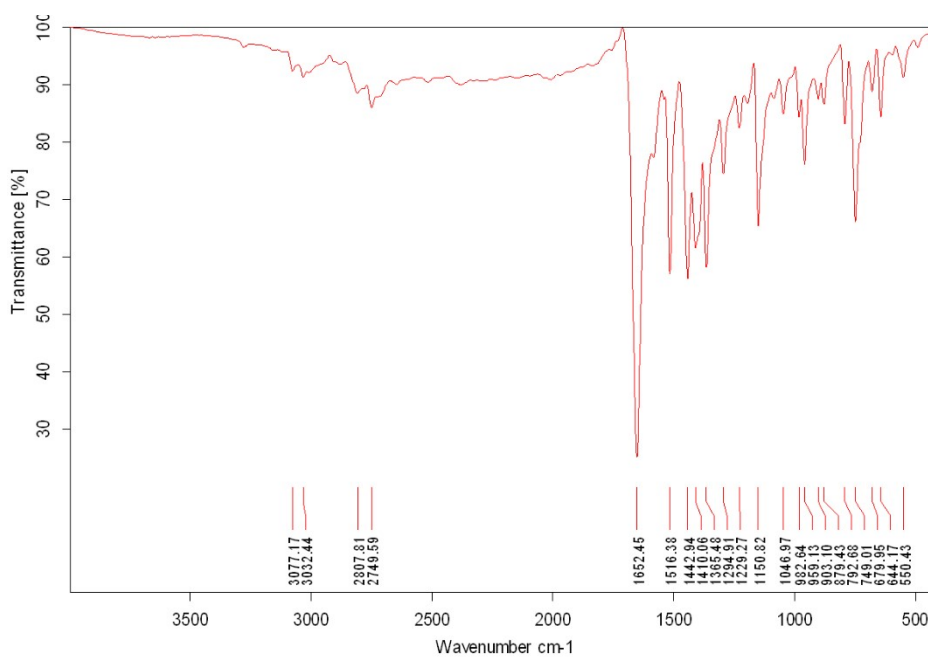

Figure S1. FT-IR spectra of compound **1**

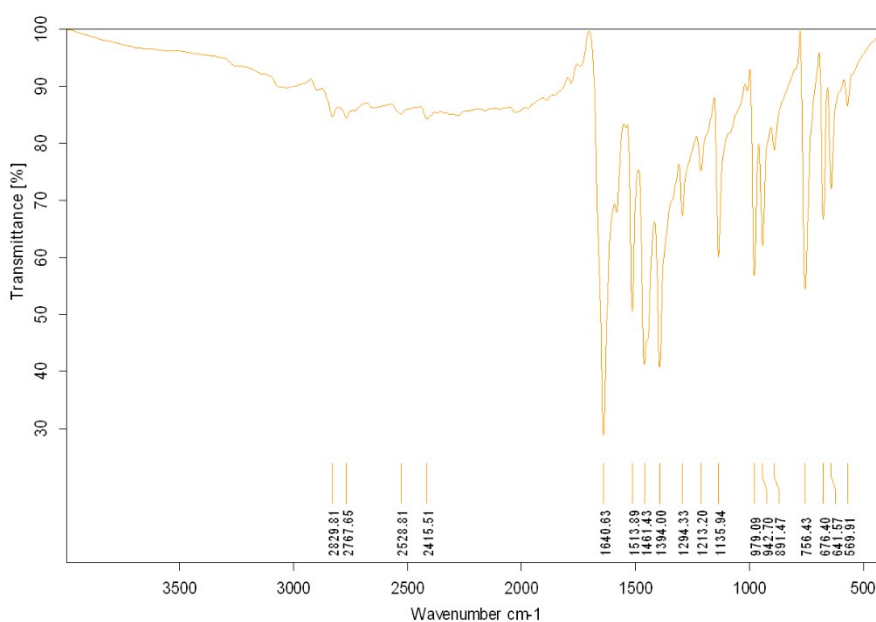

Figure S2. FT-IR spectra of co-crystal **3**

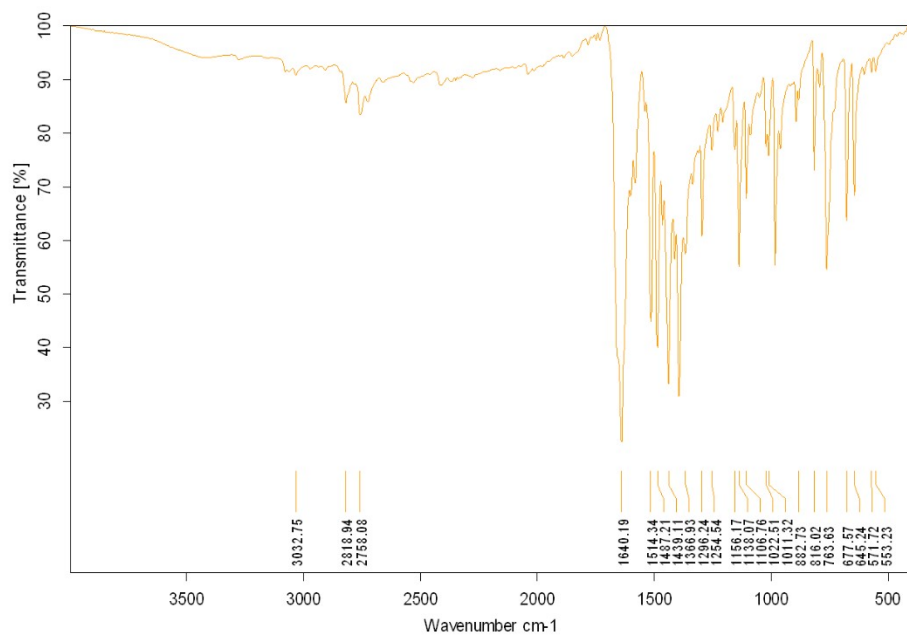

**Figure S3.** FT-IR spectra of co-crystal 4

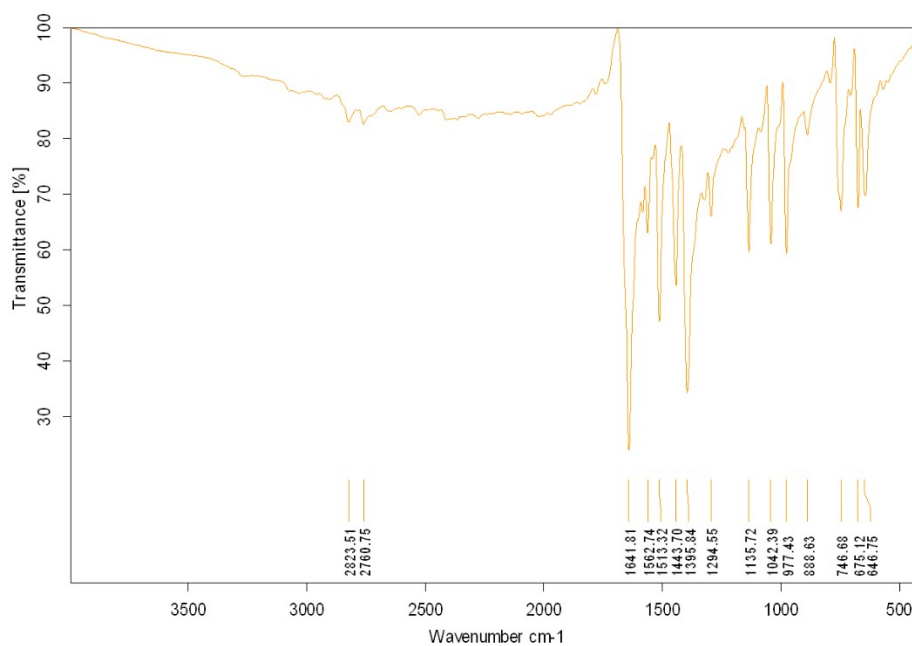

**Figure S4.** FT-IR spectra of co-crystal 5

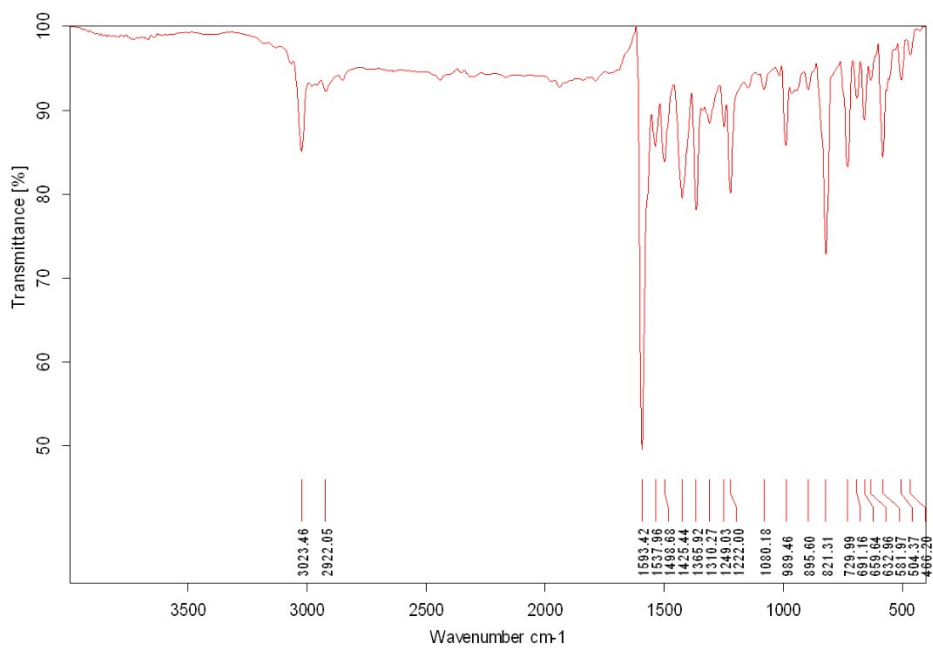

**Figure S5.** FT-IR spectra of compound **2**.

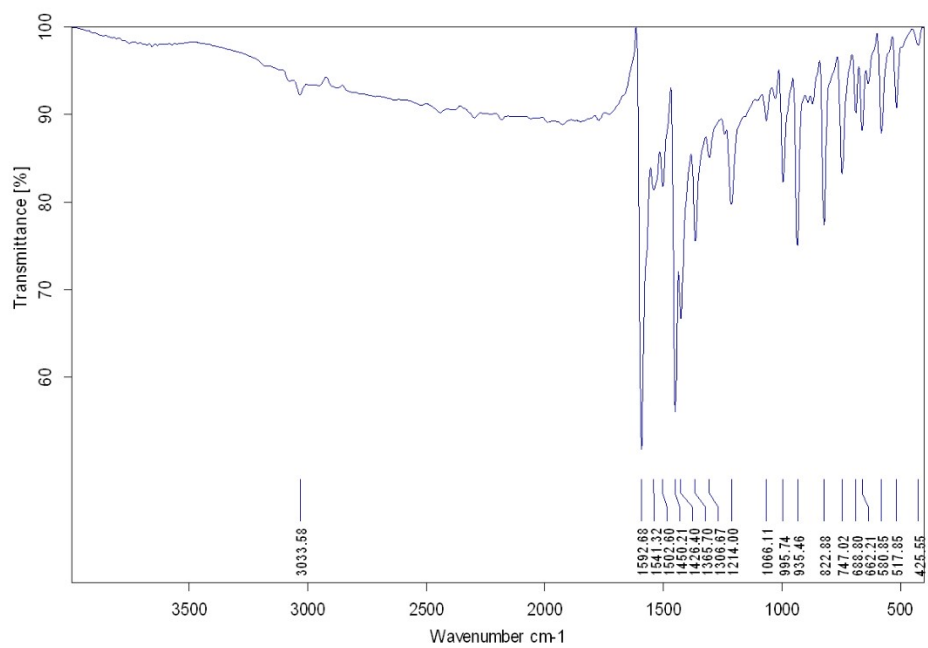

**Figure S6.** FT-IR spectra of co-crystal **6**

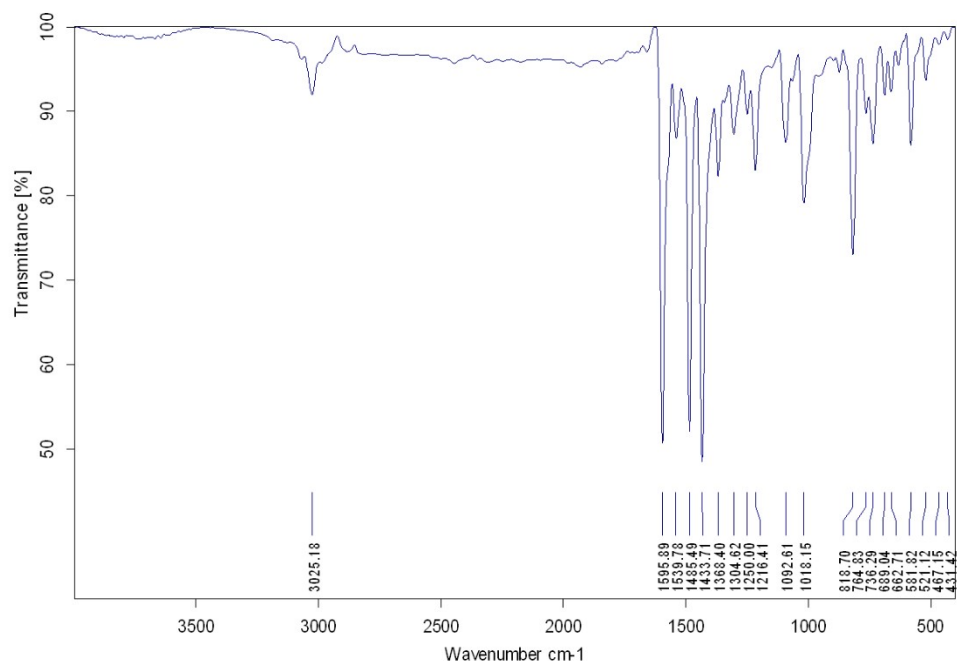

**Figure S7.** FT-IR spectra of co-crystal 7

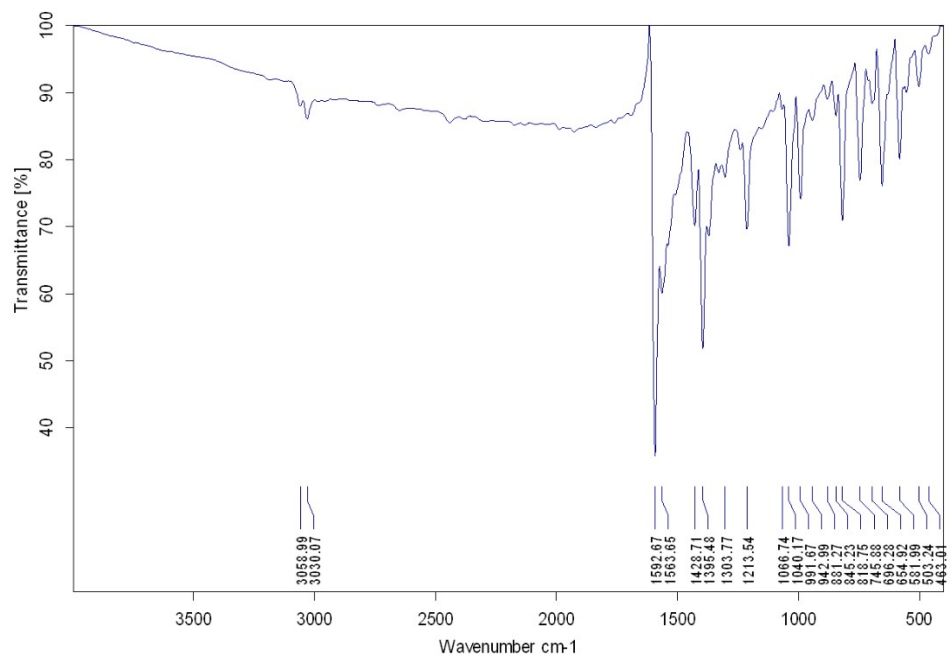

**Figure S8.** FT-IR spectra of co-crystal 8.

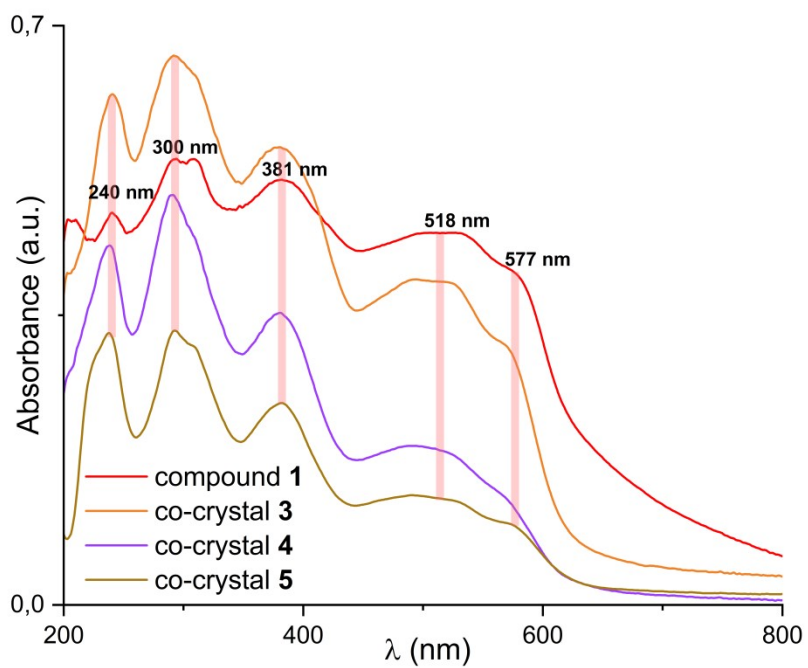

**Figure S9.** Electronic spectra of compounds **1**, **3**, **4** and **5**.

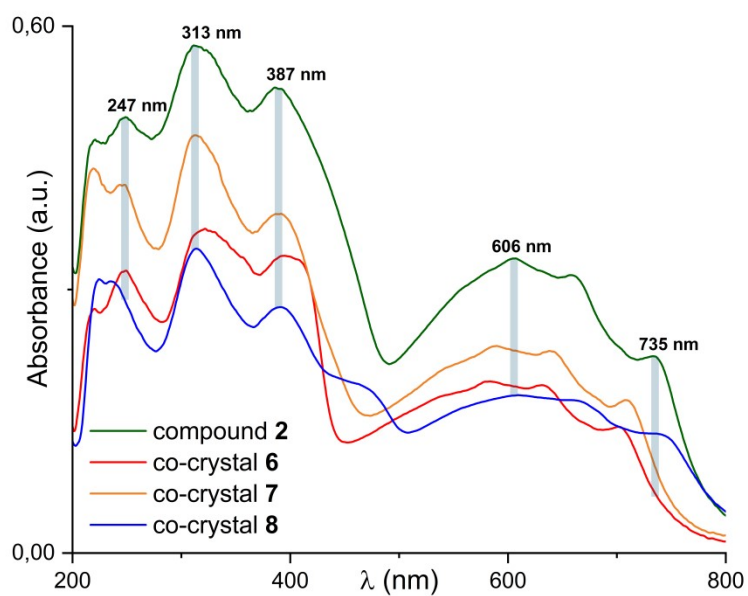

**Figure S10.** Electronic spectra of compounds **2**, **6**, **7** and **8**.

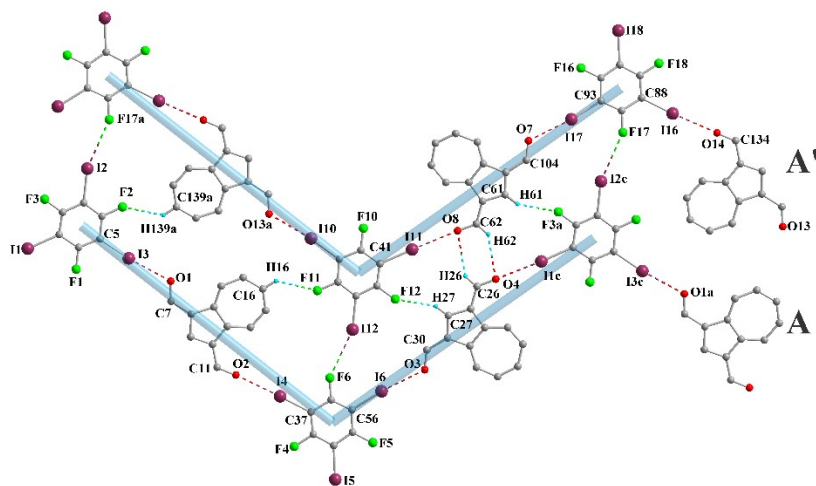

**Figure S11.** Assembly of supramolecular chains, **A** and **A'** in crystal structure **5**

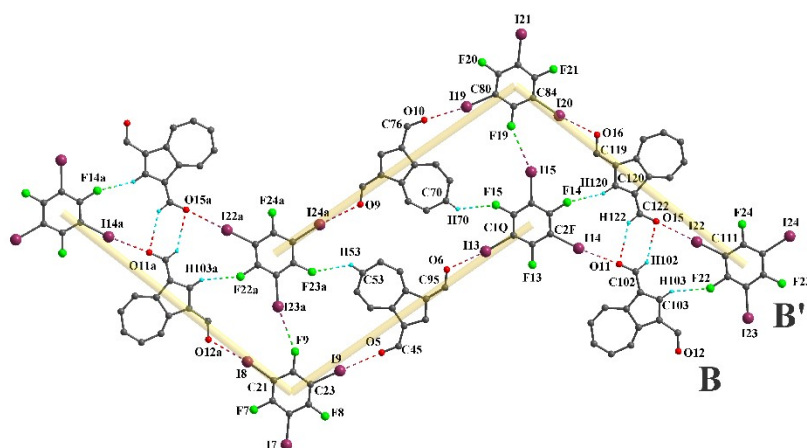

**Figure S12.** Assembly of supramolecular chains, **B** and **B'** in crystal structure **5**

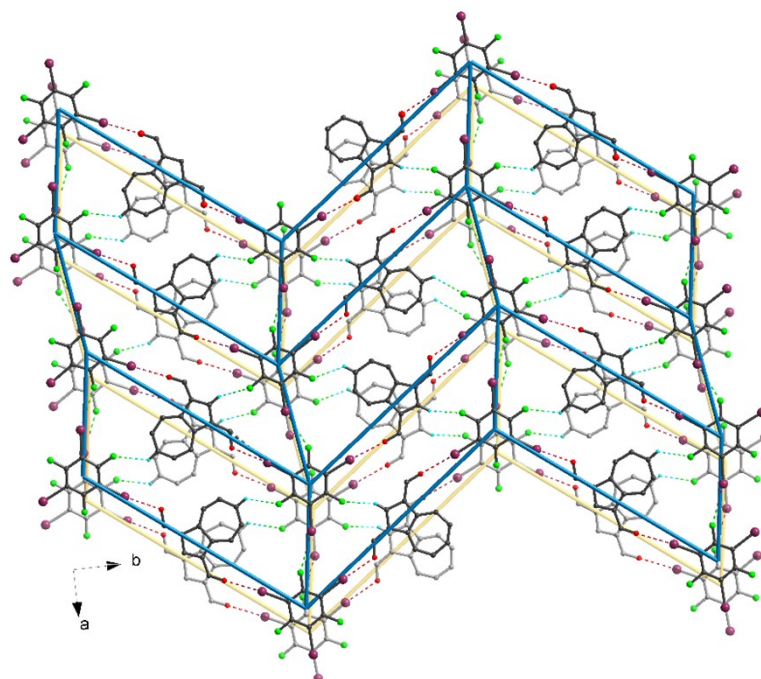

**Figure S13.** Crystal packing diagram in crystal structure **5**. View alongside crystallographic *c* axis.

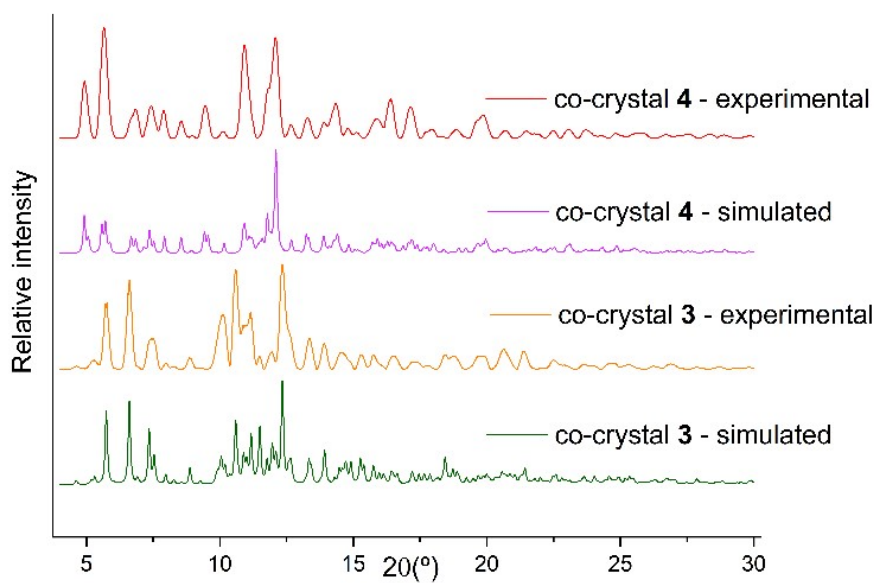

**Figure S14** Powder X-ray diffractograms for compounds **3** and **4**

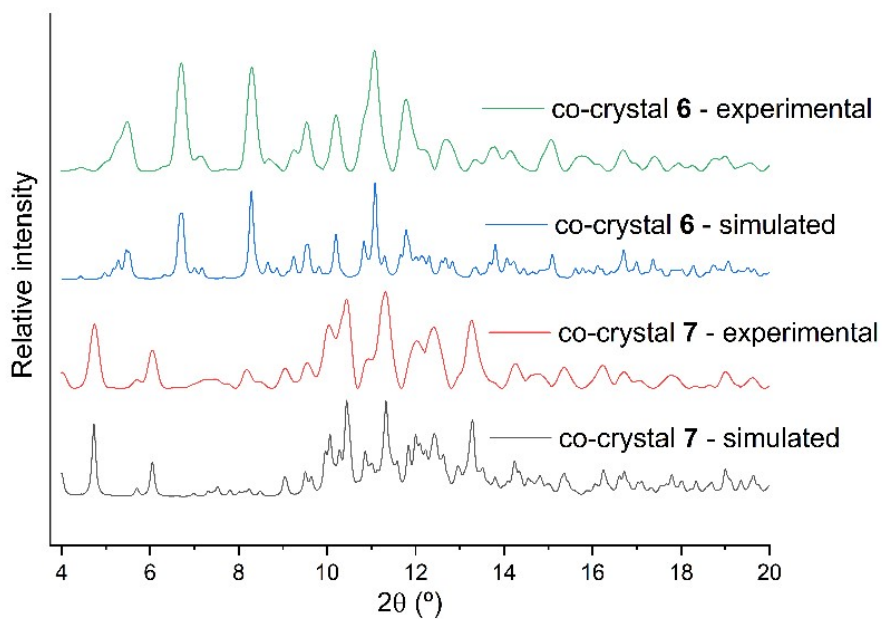

**Figure S15** Powder X-ray diffractograms for compounds **6** and **7**

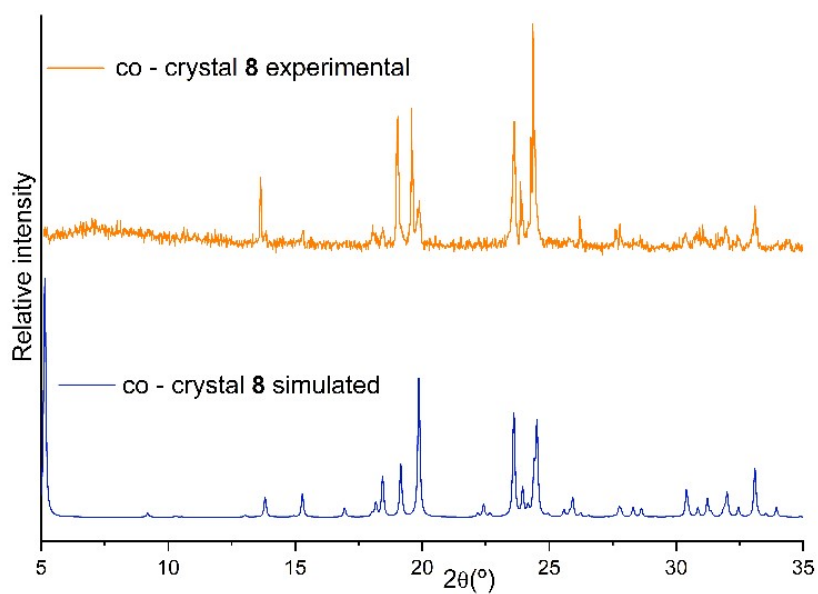

**Figure S16** Powder X-ray diffractograms for compounds **8**





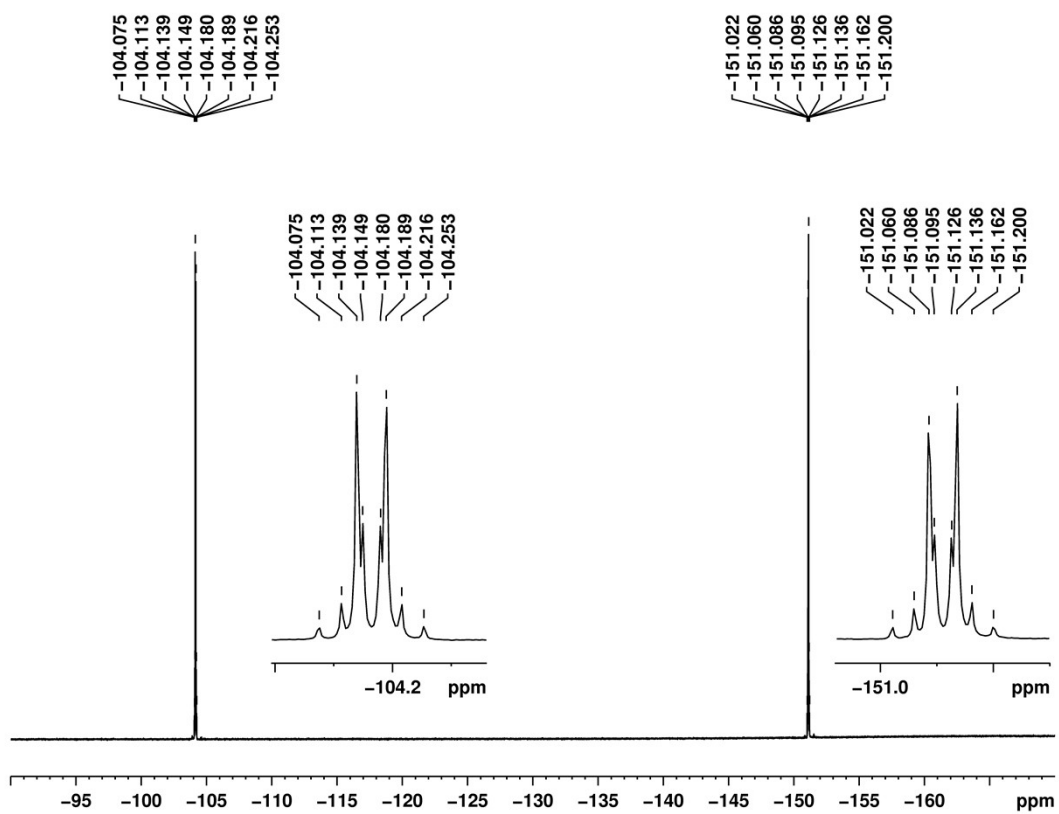

**Figure S18.**  $^{19}\text{F}$ -NMR spectrum of co-crystal 4

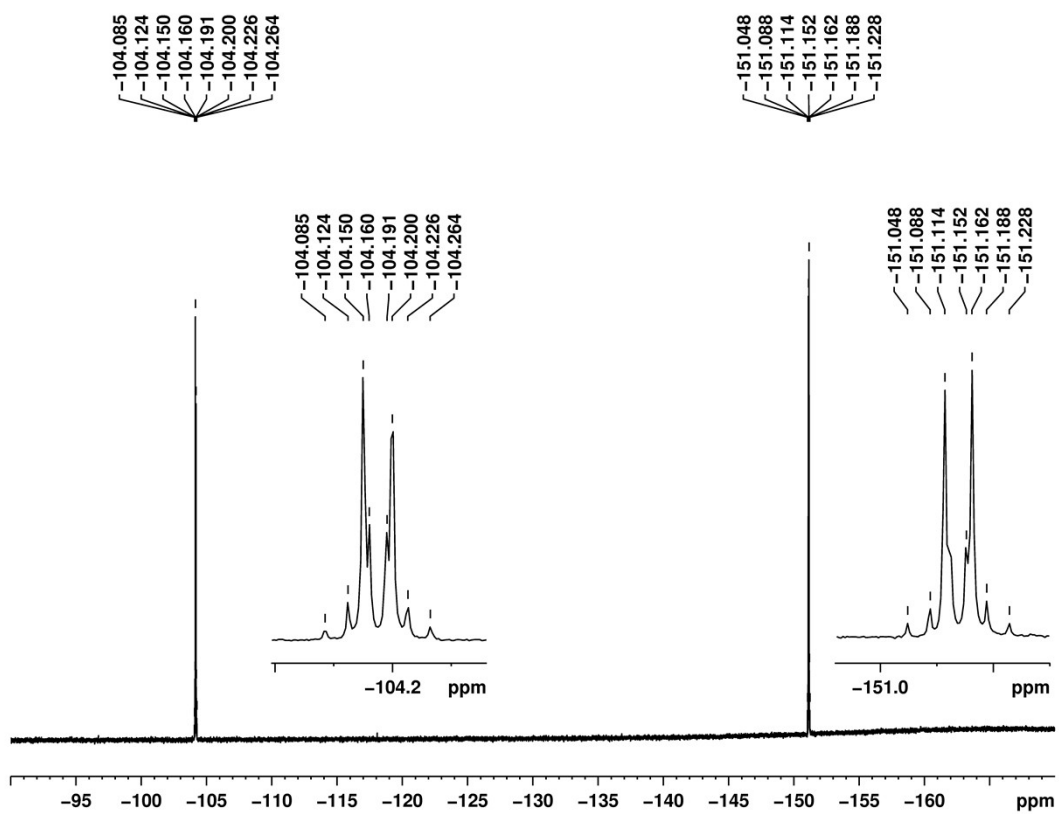

Figure S19.  $^{19}\text{F}$ -NMR spectrum of co-crystal 7

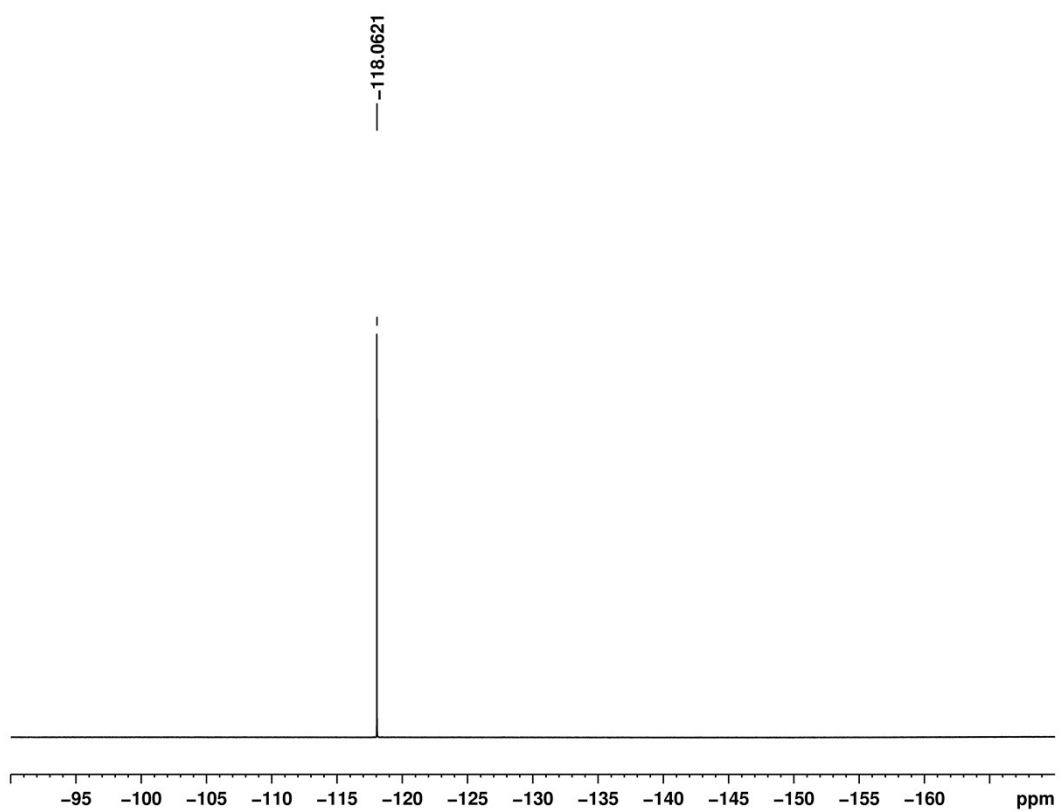

**Figure S20.**  $^{19}\text{F}$ -NMR spectrum of 1,4-diiodopertetrafluorobenzene (1,4-ditfb)

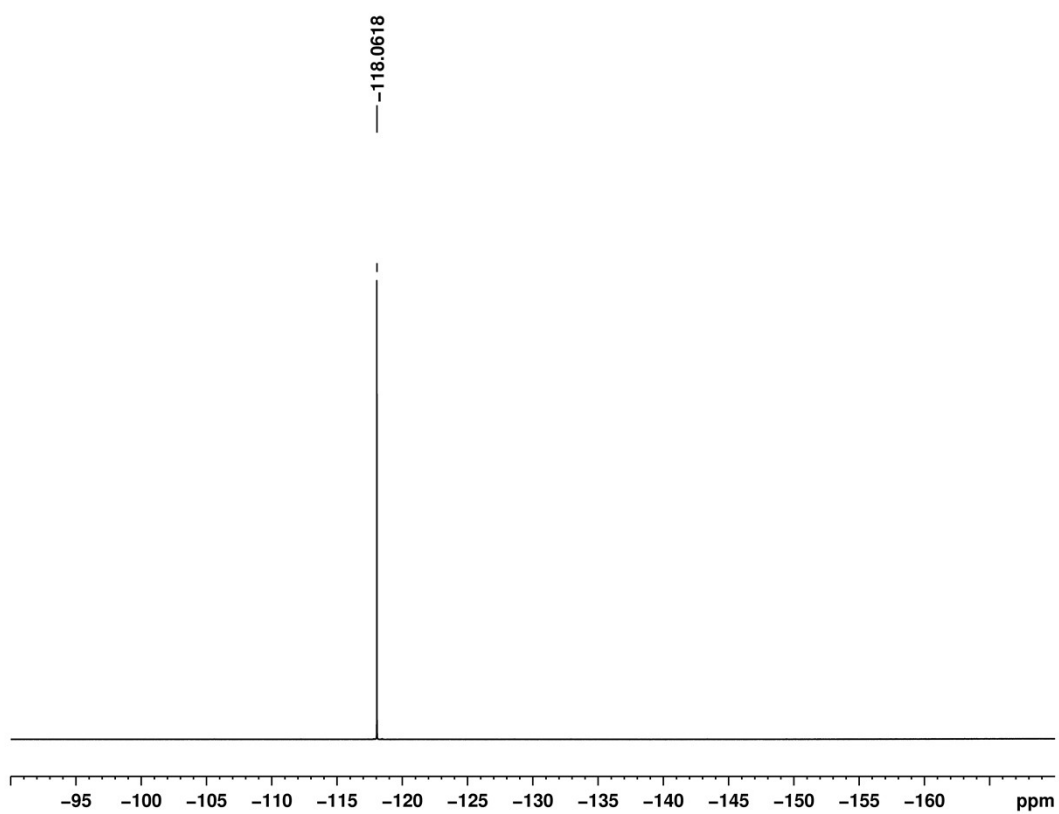

**Figure S21.**  $^{19}\text{F}$ -NMR spectrum of co-crystal **3**

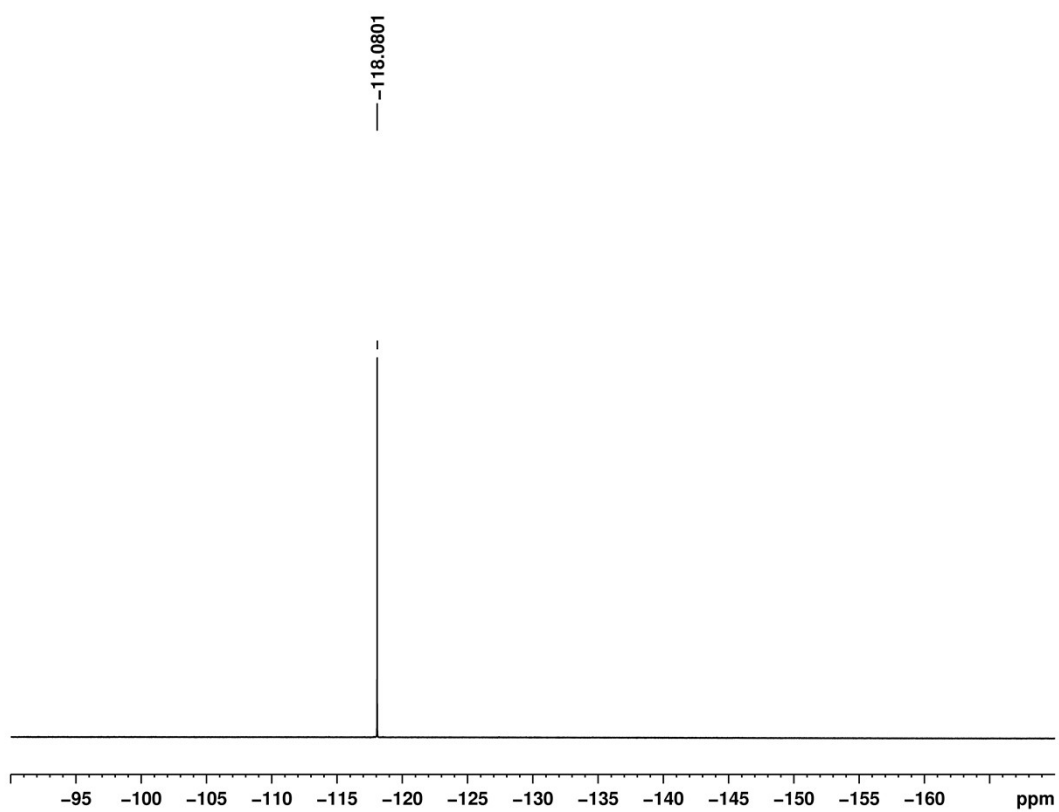

**Figure S22.**  $^{19}\text{F}$ -NMR spectrum of co-crystal **6**

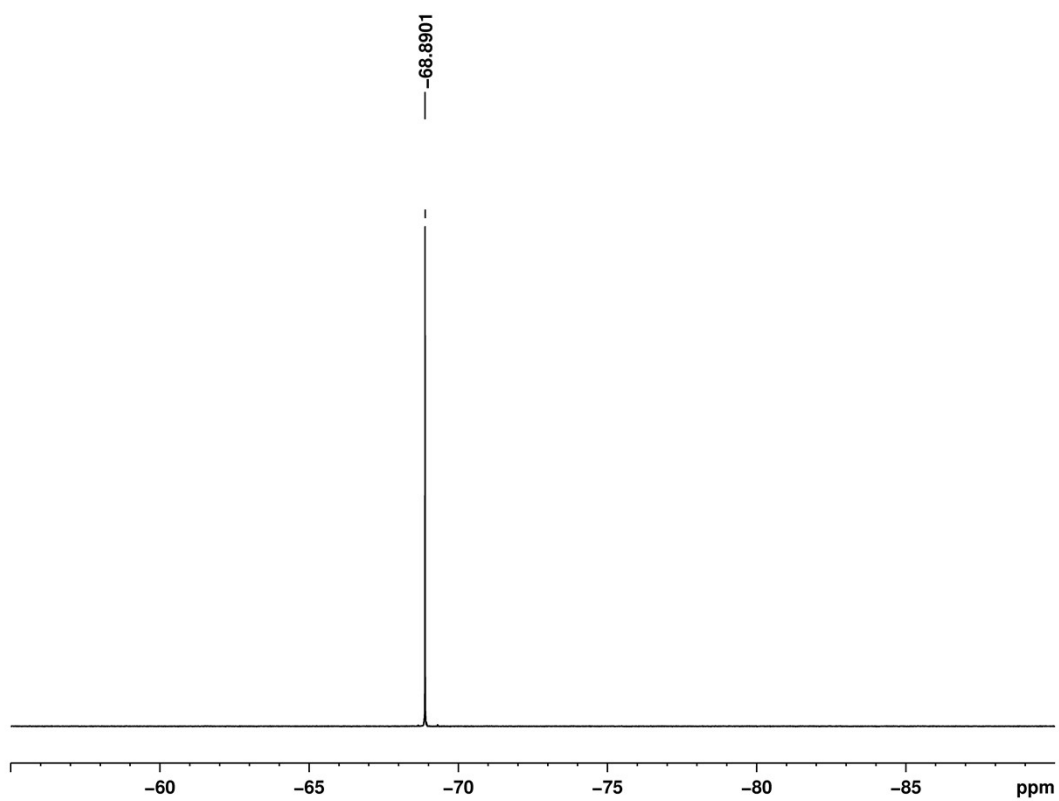

**Figure S23.**  $^{19}\text{F}$ -NMR spectrum of triiodopertrifluorobenzene (1,3,5-titfb)

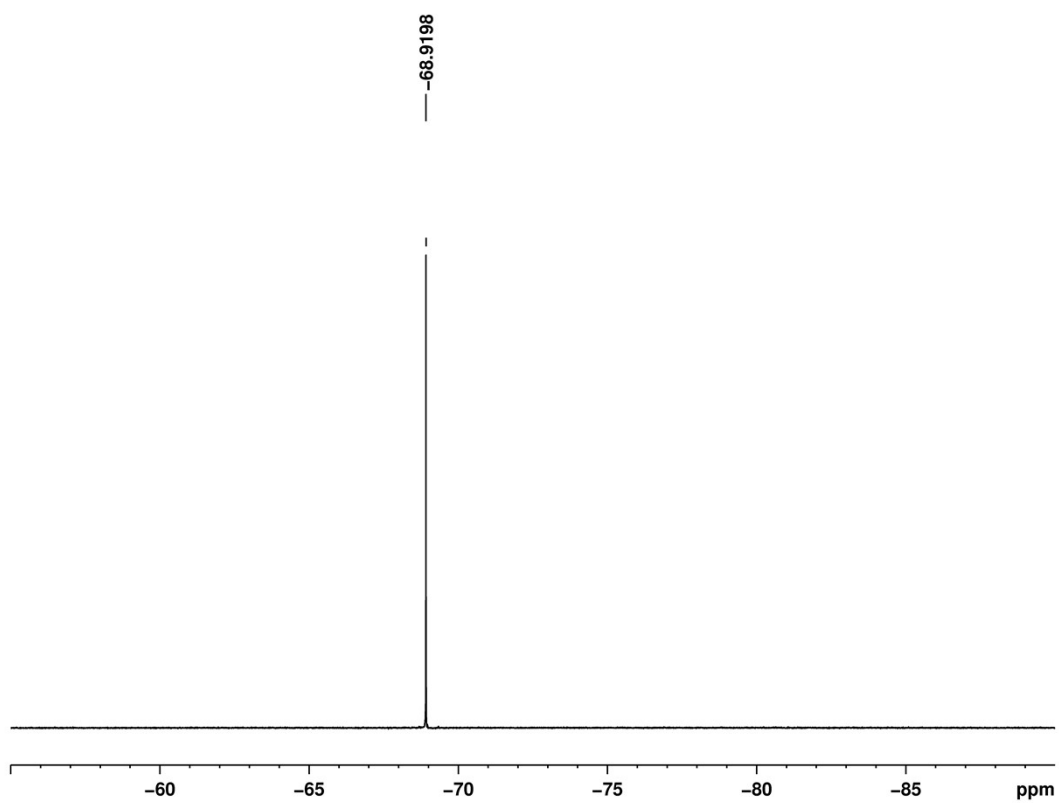

**Figure S24.**  $^{19}\text{F}$ -NMR spectrum of co-crystal **8**



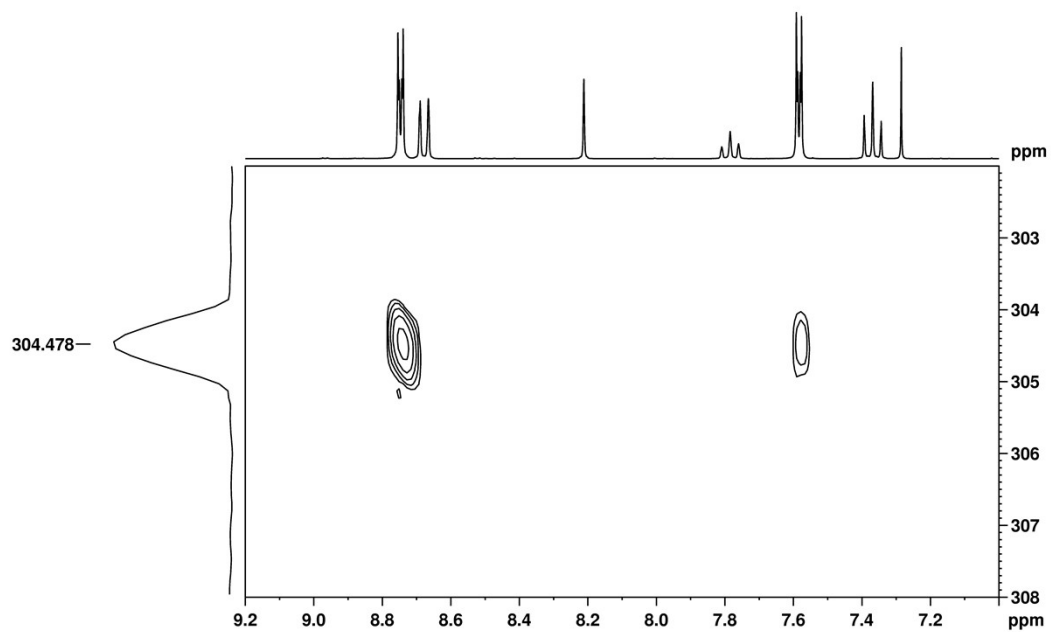

**Figure S25.**  $^1\text{H}$ - $^{15}\text{N}$  HMBC NMR spectrum of azbipy, **2**

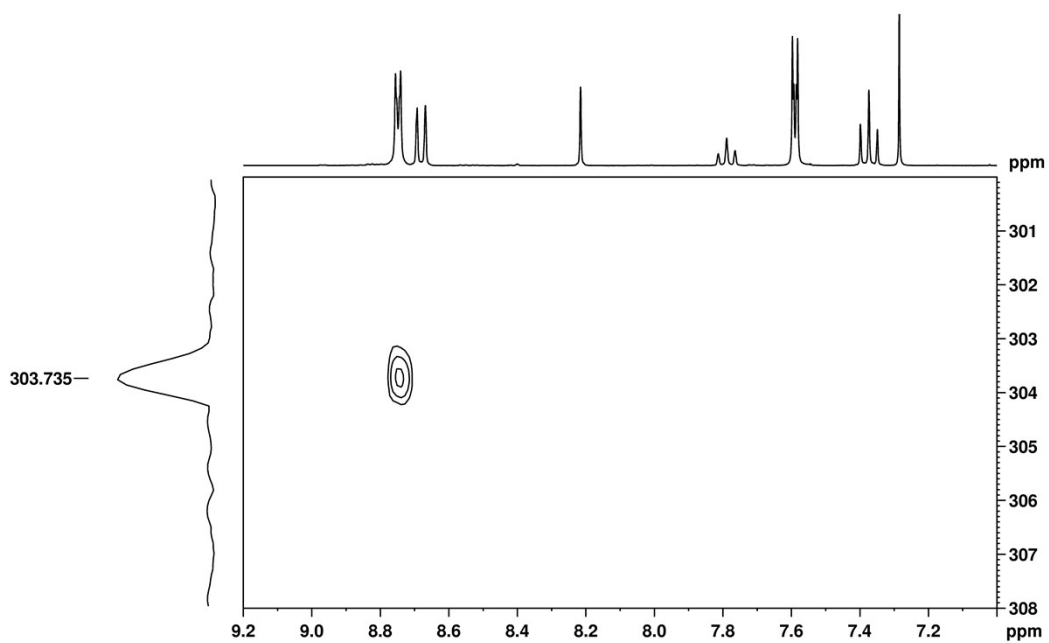

**Figure S26.**  $^1\text{H}$ - $^{15}\text{N}$  HMBC NMR spectrum of co-crystal **6**

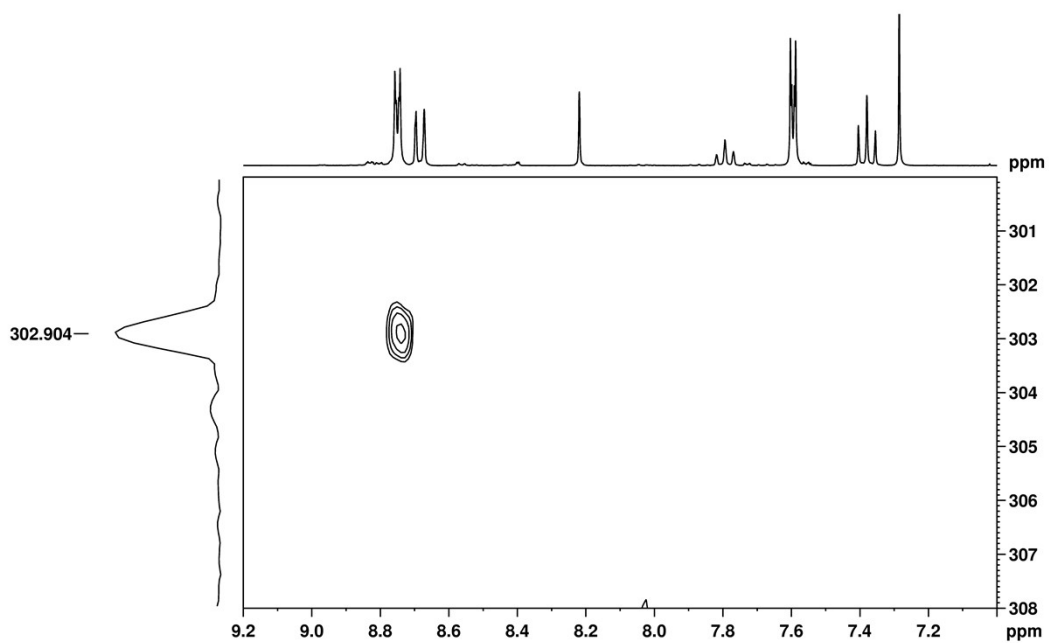

**Figure S27.**  $^1\text{H}$ - $^{15}\text{N}$  HMBC NMR spectrum of co-crystal **7**

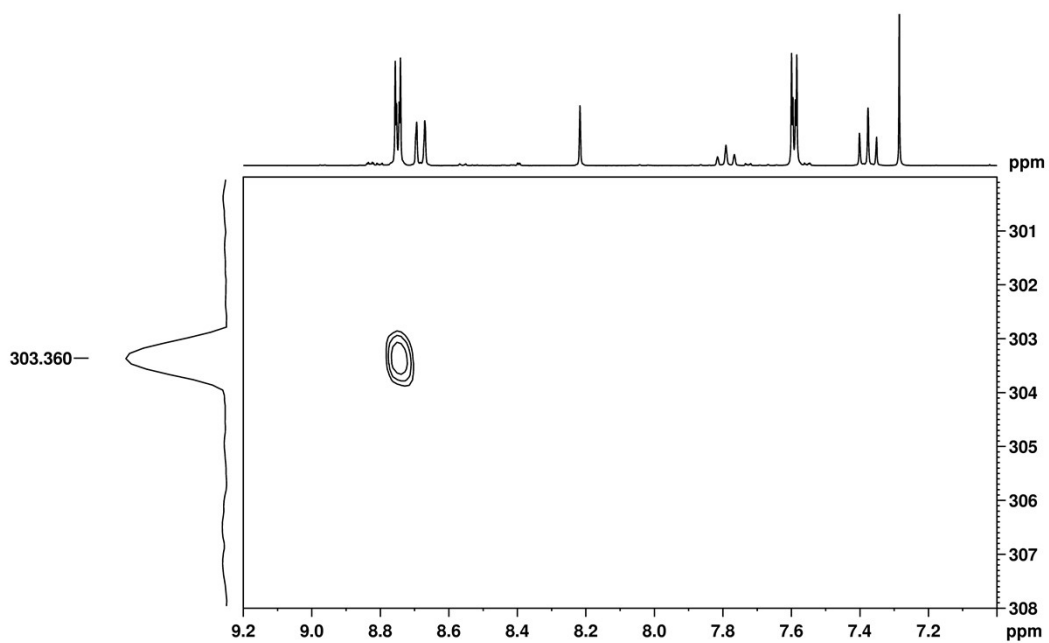

**Figure S28.**  $^1\text{H}$ - $^{15}\text{N}$  HMBC NMR spectrum of co-crystal **8**

**Table S1.** Cartesian atomic coordinates for model supramolecular associates.

| <b>3</b> |           |           |           |
|----------|-----------|-----------|-----------|
| I        | 12.985538 | 6.000650  | 1.721057  |
| F        | 14.240994 | 6.174341  | -1.253918 |
| F        | 15.518262 | 8.103018  | -2.551791 |
| C        | 14.461139 | 7.332195  | -0.612982 |
| C        | 15.135435 | 8.340916  | -1.275620 |
| C        | 14.027384 | 7.507847  | 0.687282  |
| I        | 16.458462 | 11.052950 | -1.721057 |
| F        | 15.203006 | 10.879259 | 1.253918  |
| F        | 13.925738 | 8.950582  | 2.551791  |
| C        | 14.982861 | 9.721405  | 0.612982  |
| C        | 14.308565 | 8.712684  | 1.275620  |
| C        | 15.416616 | 9.545753  | -0.687282 |
| I        | 7.601467  | 1.402232  | 15.021084 |
| F        | 5.215702  | 0.545033  | 19.770266 |
| F        | 5.634912  | 0.075889  | 17.201003 |
| C        | 7.164720  | 1.863958  | 17.021504 |
| C        | 6.057645  | 1.353203  | 19.103030 |
| C        | 6.285393  | 1.104221  | 17.774076 |
| I        | 6.236360  | 2.861168  | 21.761491 |
| F        | 8.622125  | 3.718367  | 17.012309 |
| F        | 8.202915  | 4.187511  | 19.581571 |
| C        | 6.673107  | 2.399442  | 19.761070 |
| C        | 7.780182  | 2.910197  | 17.679545 |
| C        | 7.552434  | 3.159179  | 19.008499 |
| C        | 10.380414 | 0.423782  | 8.638388  |
| C        | 12.262060 | -0.862912 | 5.752611  |
| H        | 12.423516 | -0.409389 | 4.957040  |
| C        | 10.418892 | 1.513507  | 7.760388  |
| H        | 10.009113 | 2.332694  | 7.919895  |
| C        | 11.596179 | -0.138134 | 6.726613  |
| C        | 9.692901  | 0.471532  | 9.936629  |
| C        | 11.106470 | -0.633541 | 8.039567  |
| C        | 12.611159 | -3.108019 | 6.810478  |
| H        | 13.033891 | -3.921902 | 6.655972  |
| C        | 12.611426 | 2.208441  | 4.815023  |
| H        | 13.311102 | 1.641418  | 5.047857  |
| C        | 11.157358 | 1.205690  | 6.608541  |
| C        | 11.956345 | -2.997170 | 8.022280  |
| H        | 11.971886 | -3.759398 | 8.555333  |
| C        | 12.723859 | -2.176039 | 5.796750  |
| H        | 13.172154 | -2.467468 | 5.035663  |
| N        | 11.828201 | 3.960699  | 3.382526  |
| C        | 11.277752 | -1.908298 | 8.557466  |
| H        | 10.880006 | -2.057014 | 9.384945  |

|          |           |           |           |
|----------|-----------|-----------|-----------|
| N        | 8.352487  | 0.768265  | 12.403820 |
| C        | 11.399637 | 2.149606  | 5.508007  |
| C        | 12.763733 | 3.112282  | 3.782720  |
| H        | 13.579858 | 3.125968  | 3.337007  |
| C        | 10.098828 | -0.208054 | 11.080199 |
| H        | 10.833086 | -0.777857 | 11.050239 |
| C        | 8.577167  | 1.290105  | 10.087805 |
| H        | 8.242020  | 1.751976  | 9.353514  |
| C        | 7.964100  | 1.422270  | 11.314504 |
| H        | 7.239230  | 2.000549  | 11.383821 |
| C        | 9.401376  | -0.029844 | 12.265150 |
| H        | 9.688765  | -0.502246 | 13.012921 |
| C        | 10.428165 | 3.063679  | 5.108548  |
| H        | 9.607765  | 3.089226  | 5.545893  |
| C        | 10.678447 | 3.931707  | 4.067049  |
| H        | 10.009703 | 4.531866  | 3.826215  |
| <b>4</b> |           |           |           |
| I        | 1.172716  | 29.113266 | 13.981182 |
| I        | 1.601243  | 32.178963 | 16.012720 |
| F        | 0.238165  | 34.487450 | 14.443254 |
| F        | -0.467606 | 30.039968 | 11.459734 |
| F        | -1.180854 | 34.588044 | 12.173885 |
| F        | -1.520379 | 32.360514 | 10.688591 |
| C        | -0.265926 | 31.112738 | 12.235699 |
| C        | 0.444889  | 31.022479 | 13.419813 |
| C        | 0.625592  | 32.165527 | 14.172762 |
| C        | -0.638802 | 33.431905 | 12.566689 |
| C        | 0.086826  | 33.355771 | 13.732829 |
| C        | -0.804431 | 32.312628 | 11.819220 |
| I        | 5.146257  | 13.950143 | 12.332146 |
| I        | 3.764840  | 11.893139 | 15.065122 |
| F        | 6.631180  | 11.904852 | 10.428621 |
| F        | 6.962819  | 9.258066  | 10.481448 |
| F        | 4.275119  | 8.939405  | 14.285869 |
| F        | 5.730643  | 7.761218  | 12.370068 |
| C        | 5.313397  | 11.866268 | 12.395495 |
| C        | 6.038193  | 11.199662 | 11.420935 |
| C        | 4.745018  | 11.087356 | 13.400742 |
| C        | 4.863231  | 9.726929  | 13.353615 |
| C        | 6.199302  | 9.861284  | 11.415894 |
| C        | 5.594387  | 9.101319  | 12.378178 |
| N        | 4.629618  | 16.805350 | 12.808247 |
| N        | 2.070792  | 26.601179 | 14.642287 |
| C        | 2.817009  | 23.948537 | 15.184585 |
| C        | 3.830695  | 22.707996 | 17.866707 |
| H        | 3.496204  | 23.575582 | 17.859736 |
| C        | 4.879845  | 19.813171 | 17.237824 |
| H        | 5.144139  | 18.999533 | 16.873756 |

|          |           |           |           |
|----------|-----------|-----------|-----------|
| C        | 3.435147  | 21.594920 | 14.455090 |
| H        | 3.224590  | 21.707984 | 13.556308 |
| C        | 3.741401  | 22.038979 | 16.666372 |
| C        | 4.200803  | 20.665117 | 16.373083 |
| C        | 3.283455  | 22.573986 | 15.440391 |
| C        | 1.991959  | 24.668884 | 16.027845 |
| H        | 1.661995  | 24.274295 | 16.801640 |
| C        | 3.232370  | 24.611353 | 14.028967 |
| H        | 3.768670  | 24.173185 | 13.408283 |
| C        | 4.341373  | 22.288052 | 19.079097 |
| H        | 4.252905  | 22.891959 | 19.780710 |
| C        | 3.949783  | 20.418456 | 15.015802 |
| C        | 4.949704  | 18.005240 | 12.323378 |
| H        | 5.323347  | 18.045753 | 11.472535 |
| C        | 4.762153  | 19.187905 | 13.000704 |
| H        | 5.013987  | 19.994894 | 12.613488 |
| C        | 4.201534  | 19.169302 | 14.254523 |
| C        | 3.828888  | 17.932895 | 14.763065 |
| H        | 3.427102  | 17.866063 | 15.598192 |
| C        | 5.217672  | 20.008502 | 18.570555 |
| H        | 5.681985  | 19.307068 | 18.967854 |
| C        | 1.659771  | 25.958000 | 15.725350 |
| H        | 1.108828  | 26.414771 | 16.318590 |
| C        | 4.063981  | 16.811207 | 14.009020 |
| H        | 3.807508  | 15.991988 | 14.366994 |
| C        | 2.846199  | 25.916660 | 13.807357 |
| H        | 3.143900  | 26.339670 | 13.035206 |
| C        | 4.967682  | 21.090573 | 19.396936 |
| H        | 5.255897  | 21.004345 | 20.277459 |
| <b>5</b> |           |           |           |
| I        | 17.169700 | 1.579127  | 6.919269  |
| I        | 20.153794 | 2.239373  | 12.167554 |
| F        | 17.169700 | 2.248578  | 13.051208 |
| F        | 19.507870 | 1.816530  | 9.035733  |
| C        | 17.169700 | 1.812076  | 8.992281  |
| C        | 18.344451 | 1.895220  | 9.703665  |
| C        | 17.169700 | 2.124606  | 11.728226 |
| C        | 18.381537 | 2.056310  | 11.066831 |
| I        | 14.185606 | 2.239373  | 12.167554 |
| F        | 14.831530 | 1.816530  | 9.035733  |
| C        | 15.994949 | 1.895220  | 9.703665  |
| C        | 15.957863 | 2.056310  | 11.066831 |
| C        | 26.355146 | 3.090403  | 17.780952 |
| H        | 26.165936 | 2.726429  | 16.946402 |
| C        | 25.252851 | 3.486818  | 18.518677 |
| N        | 22.218965 | 2.658355  | 14.252679 |
| C        | 23.104922 | 3.711750  | 19.226600 |
| C        | 23.900222 | 3.391797  | 18.118379 |

|          |           |           |           |
|----------|-----------|-----------|-----------|
| C        | 27.701594 | 3.158699  | 18.107420 |
| H        | 28.286806 | 2.782298  | 17.490457 |
| C        | 23.378950 | 3.287868  | 14.399570 |
| H        | 23.810665 | 3.591593  | 13.634063 |
| C        | 23.980920 | 3.517254  | 15.615075 |
| H        | 24.798507 | 3.959049  | 15.652240 |
| C        | 22.152690 | 2.423773  | 16.633893 |
| H        | 21.698449 | 2.102944  | 17.379327 |
| C        | 23.369335 | 3.091145  | 16.785783 |
| C        | 28.285707 | 3.711750  | 19.226600 |
| H        | 29.215755 | 3.711735  | 19.226638 |
| C        | 21.630731 | 2.244866  | 15.375512 |
| H        | 20.813694 | 1.806516  | 15.301759 |
| H        | 22.172951 | 3.711750  | 19.226600 |
| C        | 26.355146 | 4.333097  | 20.672248 |
| H        | 26.165936 | 4.697071  | 21.506798 |
| C        | 25.252851 | 3.936682  | 19.934523 |
| N        | 22.218965 | 4.765145  | 24.200521 |
| C        | 23.900222 | 4.031703  | 20.334821 |
| C        | 27.701594 | 4.264801  | 20.345780 |
| H        | 28.286806 | 4.641202  | 20.962743 |
| C        | 23.378950 | 4.135632  | 24.053630 |
| H        | 23.810665 | 3.831907  | 24.819137 |
| C        | 23.980920 | 3.906246  | 22.838125 |
| H        | 24.798507 | 3.464451  | 22.800960 |
| C        | 22.152690 | 4.999727  | 21.819307 |
| H        | 21.698449 | 5.320556  | 21.073873 |
| C        | 23.369335 | 4.332355  | 21.667417 |
| C        | 21.630731 | 5.178634  | 23.077688 |
| H        | 20.813694 | 5.616984  | 23.151441 |
| <b>6</b> |           |           |           |
| I        | 4.198617  | 7.620333  | 5.383832  |
| I        | 6.789264  | 5.390588  | 11.454634 |
| F        | 4.251498  | 8.901284  | 8.324928  |
| F        | 5.337693  | 8.092110  | 10.600521 |
| F        | 5.621412  | 4.904133  | 6.253280  |
| F        | 6.638629  | 4.063478  | 8.553407  |
| C        | 6.019759  | 6.050038  | 9.645201  |
| C        | 4.921020  | 6.938700  | 7.211666  |
| C        | 5.416005  | 7.277441  | 9.531728  |
| C        | 4.864054  | 7.718008  | 8.355596  |
| C        | 6.056529  | 5.261264  | 8.502804  |
| C        | 5.534305  | 5.714518  | 7.322072  |
| O        | 0.554388  | 13.416775 | -1.298805 |
| O        | 3.552679  | 8.486079  | 2.698816  |
| C        | 2.454381  | 10.161889 | 1.415345  |
| C        | 2.182268  | 10.893327 | -0.759042 |
| C        | 2.796889  | 9.848153  | 0.061337  |



|   |           |           |           |
|---|-----------|-----------|-----------|
| C | 1.497980  | 11.772933 | 0.118073  |
| C | 1.672990  | 11.313683 | 1.409211  |
| H | 1.318709  | 11.719104 | 2.166720  |
| C | 0.715463  | 12.946605 | -0.203945 |
| H | 0.296778  | 13.379818 | 0.506028  |
| C | 2.259666  | 11.028813 | -2.143719 |
| H | 1.826961  | 11.769859 | -2.502539 |
| C | 2.839257  | 9.464562  | 2.612945  |
| H | 2.503898  | 9.802934  | 3.411856  |
| C | 3.556524  | 8.768870  | -0.361887 |
| H | 3.869585  | 8.208207  | 0.311284  |
| C | 3.910365  | 8.415155  | -1.649958 |
| H | 4.425329  | 7.644525  | -1.726629 |
| C | 2.898720  | 10.200881 | -3.053036 |
| H | 2.839489  | 10.465230 | -3.942418 |
| C | 3.608707  | 9.042274  | -2.827623 |
| H | 3.932361  | 8.622770  | -3.592799 |
| I | -3.021440 | 16.585546 | -9.950351 |
| I | -0.430793 | 14.355800 | -3.879548 |
| F | -2.968560 | 17.866497 | -7.009255 |
| F | -1.882365 | 17.057323 | -4.733662 |
| F | -1.598646 | 13.869346 | -9.080903 |
| F | -0.581429 | 13.028690 | -6.780776 |
| C | -1.200299 | 15.015250 | -5.688982 |
| C | -2.299038 | 15.903913 | -8.122517 |
| C | -1.804052 | 16.242654 | -5.802455 |
| C | -2.356004 | 16.683221 | -6.978587 |
| C | -1.163529 | 14.226477 | -6.831378 |
| C | -1.685753 | 14.679730 | -8.012110 |
|   | 7         |           |           |
| I | 4.011190  | 9.659645  | 1.781327  |
| I | 4.540432  | 8.499962  | 5.274706  |
| F | 1.996619  | 6.931862  | 6.053213  |
| F | 1.237842  | 8.571128  | 0.954604  |
| F | -0.209285 | 6.210211  | 4.723141  |
| F | -0.614669 | 7.039938  | 2.200161  |
| C | 2.814208  | 8.123619  | 4.173101  |
| C | 2.625417  | 8.533584  | 2.872124  |
| C | 1.821252  | 7.364023  | 4.775790  |
| C | 1.457923  | 8.163470  | 2.220943  |
| C | 0.697181  | 7.012890  | 4.128765  |
| C | 0.517071  | 7.420898  | 2.840258  |
| O | 6.916959  | 8.592640  | 7.074321  |
| O | 8.313740  | 6.470859  | 13.638781 |
| C | 10.672329 | 9.629818  | 8.968288  |
| H | 11.050315 | 10.105079 | 8.263946  |
| C | 7.777558  | 7.140475  | 11.423379 |
| C | 7.337116  | 7.800303  | 9.293879  |

|          |           |            |           |
|----------|-----------|------------|-----------|
| C        | 8.913855  | 7.882656   | 10.984178 |
| C        | 8.626681  | 8.307731   | 9.601458  |
| C        | 6.847189  | 7.099236   | 10.382875 |
| H        | 6.024706  | 6.666895   | 10.416002 |
| C        | 9.432116  | 9.057471   | 8.771548  |
| H        | 9.074427  | 9.206076   | 7.926675  |
| C        | 10.018090 | 8.165956   | 11.717104 |
| H        | 10.007286 | 7.811004   | 12.576482 |
| C        | 7.537022  | 6.501685   | 12.717429 |
| H        | 6.714708  | 6.084764   | 12.840488 |
| C        | 6.590152  | 7.938465   | 8.038623  |
| H        | 5.785708  | 7.476290   | 7.978437  |
| C        | 11.142090 | 8.878269   | 11.419223 |
| H        | 11.792033 | 8.942547   | 12.081820 |
| C        | 11.406404 | 9.535038   | 10.179208 |
| H        | 12.217746 | 9.989909   | 10.162305 |
| I        | 6.916211  | 4.639121   | 15.636244 |
| I        | 7.445453  | 3.479438   | 19.129623 |
| F        | 4.901640  | 1.911338   | 19.908131 |
| F        | 4.142863  | 3.550605   | 14.809521 |
| F        | 2.695736  | 1.189687   | 18.578059 |
| F        | 2.290352  | 2.019415   | 16.055078 |
| C        | 5.719229  | 3.103095   | 18.028018 |
| C        | 5.530438  | 3.513061   | 16.727042 |
| C        | 4.726273  | 2.343500   | 18.630707 |
| C        | 4.362944  | 3.142947   | 16.075861 |
| C        | 3.602202  | 1.992367   | 17.983683 |
| C        | 3.422092  | 2.400375   | 16.695175 |
| <b>8</b> |           |            |           |
| I        | 8.601607  | 6.222983   | 12.808023 |
| I        | 8.882937  | 0.176382   | 12.425585 |
| I        | 13.939718 | 3.408830   | 12.821143 |
| F        | 11.715836 | 5.655865   | 12.947040 |
| F        | 7.767246  | 3.157118   | 12.670680 |
| F        | 11.943892 | 1.001336   | 12.609267 |
| C        | 11.852414 | 3.325538   | 12.773966 |
| C        | 9.701592  | 4.437113   | 12.787924 |
| C        | 11.184384 | 2.128222   | 12.651139 |
| C        | 11.090485 | 4.470797   | 12.832588 |
| C        | 9.824751  | 2.033294   | 12.606475 |
| C        | 9.126022  | 3.196926   | 12.670680 |
| I        | 9.952740  | -13.558459 | 12.012162 |
| I        | 9.405215  | -7.520432  | 11.898268 |
| I        | 4.502928  | -10.987444 | 12.239112 |
| F        | 6.839772  | -13.136795 | 12.179374 |
| F        | 6.392644  | -8.482266  | 12.084462 |
| F        | 10.649063 | -10.439006 | 11.939304 |
| C        | 6.573579  | -10.809531 | 12.173791 |

|   |           |            |           |
|---|-----------|------------|-----------|
| C | 8.768620  | -11.820053 | 12.081671 |
| C | 8.544010  | -9.403985  | 12.003508 |
| C | 7.391632  | -11.902733 | 12.157042 |
| C | 7.185713  | -9.587717  | 12.076088 |
| C | 9.322069  | -10.570680 | 12.023049 |
| O | 16.333070 | -0.829853  | 11.925346 |
| O | 10.610990 | -4.841322  | 11.456372 |
| C | 12.961853 | -2.122098  | 11.741106 |
| H | 12.434297 | -1.356305  | 11.753193 |
| C | 14.329230 | -2.091476  | 11.808102 |
| C | 14.787205 | -3.444964  | 11.777396 |
| C | 15.086631 | -0.842102  | 11.894639 |
| H | 14.625817 | -0.033745  | 11.923224 |
| C | 13.550945 | -5.652803  | 11.562449 |
| H | 12.705258 | -6.026941  | 11.460056 |
| C | 12.443000 | -3.392907  | 11.648986 |
| C | 16.109342 | -3.852235  | 11.916971 |
| H | 16.744142 | -3.180176  | 12.015903 |
| C | 11.098754 | -3.769556  | 11.548492 |
| H | 10.493536 | -3.061761  | 11.553963 |
| C | 13.597572 | -4.290128  | 11.657361 |
| C | 15.981392 | -6.292800  | 11.777396 |
| H | 16.532584 | -7.041383  | 11.790544 |
| C | 14.616954 | -6.553087  | 11.601530 |
| H | 14.388516 | -7.448532  | 11.498356 |
| C | 16.580357 | -5.156728  | 11.922554 |
| H | 17.497927 | -5.227679  | 12.053197 |
| O | 7.287604  | 8.714993   | 12.572977 |
| O | 1.567795  | 12.799954  | 11.936512 |
| C | 4.574947  | 12.196703  | 12.184957 |
| C | 5.276160  | 10.016423  | 12.369197 |
| C | 3.889259  | 9.998050   | 12.285451 |
| H | 3.350617  | 9.241873   | 12.328050 |
| C | 5.570101  | 14.520905  | 12.081671 |
| H | 5.360568  | 15.419474  | 11.974365 |
| C | 4.532735  | 13.608372  | 12.034215 |
| H | 3.690097  | 13.971242  | 11.883920 |
| C | 6.080515  | 8.794610   | 12.472483 |
| H | 5.613637  | 7.990356   | 12.459279 |
| C | 3.413414  | 11.385222  | 12.123543 |
| C | 5.757858  | 11.354601  | 12.288243 |
| C | 2.049101  | 11.709815  | 12.073296 |
| H | 1.453171  | 11.000183  | 12.151263 |
| C | 7.635866  | 13.041867  | 12.352448 |
| H | 8.562753  | 13.114502  | 12.388039 |
| C | 7.050899  | 11.764934  | 12.388737 |
| H | 7.660102  | 11.073032  | 12.499644 |
| C | 6.872172  | 14.193251  | 12.271494 |

|   |          |           |           |
|---|----------|-----------|-----------|
| H | 7.398465 | 14.955001 | 12.372491 |
|---|----------|-----------|-----------|
